# Supplementary material for: Copper-fixed quat: a hybrid nanoparticle for application as a locally systemic pesticide (LSP) to manage bacterial spot disease of tomato
Source: PubMed Central journal article supplement (PMC9417342; doi:10.1039/d0na00917b), 2021-01-22
Supplement: NA-003-D0NA00917B-s001.pdf [file NA-003-D0NA00917B-s001.pdf]

**Supporting information**

**Copper-fixed quat: A hybrid nanoparticle for application as a Locally Systemic Pesticide (LSP) to manage bacterial spot disease of tomato**

Ali Ozcan<sup>1,2,‡</sup>, Mikaeel Young<sup>2,3</sup>, Briana Lee<sup>2</sup>, Ying-Yu Liao<sup>6,7</sup>, Susannah Da Silva<sup>6</sup>, Dylan Godden<sup>6</sup>, James Colee<sup>6</sup>, Ziyang Huang<sup>1,2</sup>, Hajeewaka C. Mendis<sup>2</sup>, Maria G. N. Campos<sup>2</sup>, Jeffrey B. Jones<sup>6</sup>, Joshua H. Freeman<sup>6</sup>, Mathews L. Paret<sup>6,7</sup>, Laurene Tetard<sup>2,4</sup>, Swadeshmukul Santra<sup>1,2,3,5\*</sup>

<sup>1</sup>Department of Chemistry, <sup>2</sup>NanoScience Technology Center, <sup>3</sup>Burnett School of Biomedical Sciences, <sup>4</sup>Department of Physics and <sup>5</sup>Department of Materials Science and Engineering, University of Central Florida, 4353 Scorpius St., Suite 245, Orlando, FL 32826, USA

<sup>6</sup> Plant Pathology Department, University of Florida, Gainesville, FL 32611, USA

<sup>7</sup> North Florida Research and Education Center, University of Florida, Quincy, FL, 32351, USA

<sup>‡</sup>Current address: Vocational School of Technical Sciences, Karamanoglu Mehmetbey University, 70200, Karaman, Turkey

\*Phone: 407-882-2848; Fax: 407-882-2819; E-mail: [ssantra@ucf.edu](mailto:ssantra@ucf.edu)

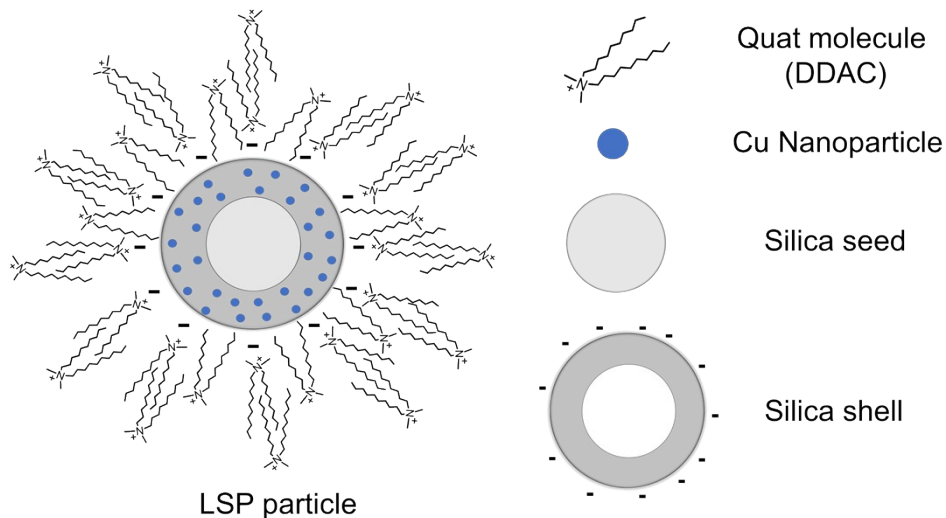

**Figure S1:** Schematics of LSP particle design. The inert silica seed reduces the amount of copper necessary to maintain antimicrobial efficacy, which is boosted by incorporated nanoclusters of copper in the shell. A second antibacterial agent, Quat, is also bound to the shell to increase the modes of action and efficacy against bacterial diseases.

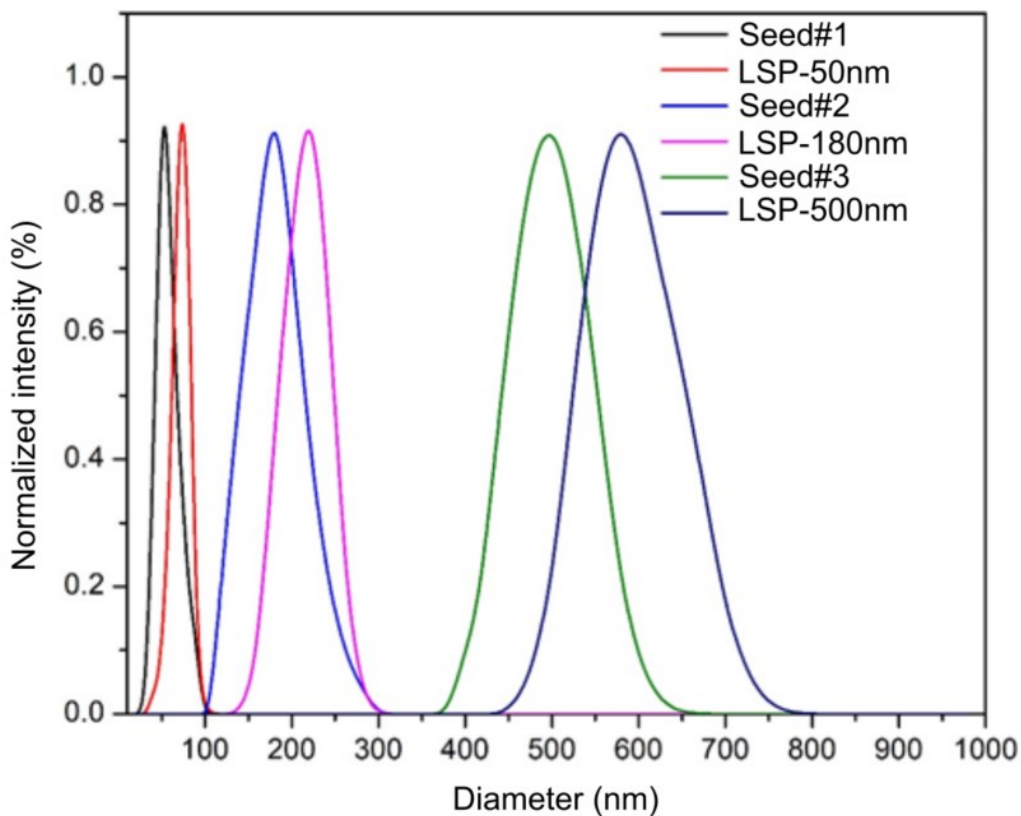

**Figure S2:** Hydrodynamic size distribution of silica seeds (seed#1, seed#2, seed#3) and resulting LSP particles after adding the shell with 2 actives (LSP-50nm, LSP-180nm, LSP-600nm) determined by DLS.

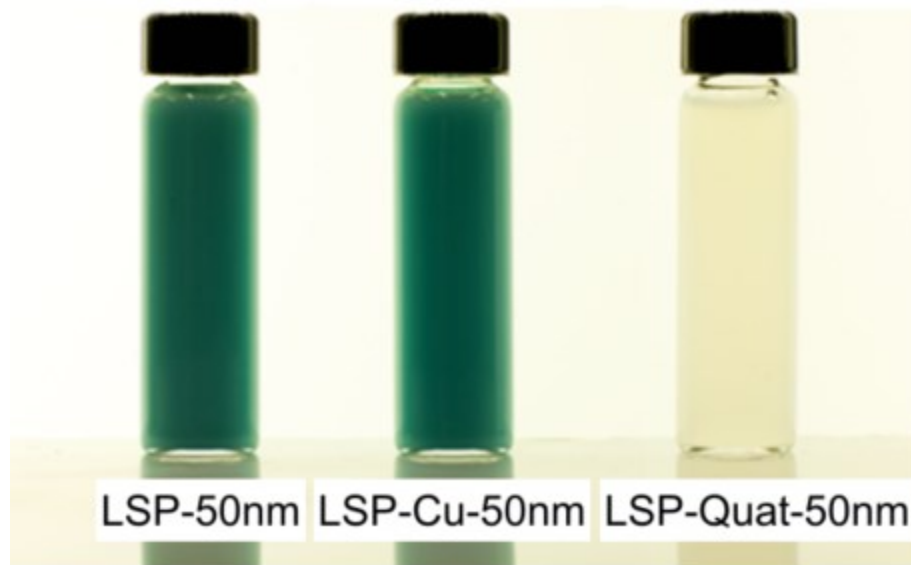

**Figure S3:** Solution of LSP-50nm (left), control with Cu-active only LSP-Cu-50nm (center) and control with Quat only LSP-Quat-50nm (right).

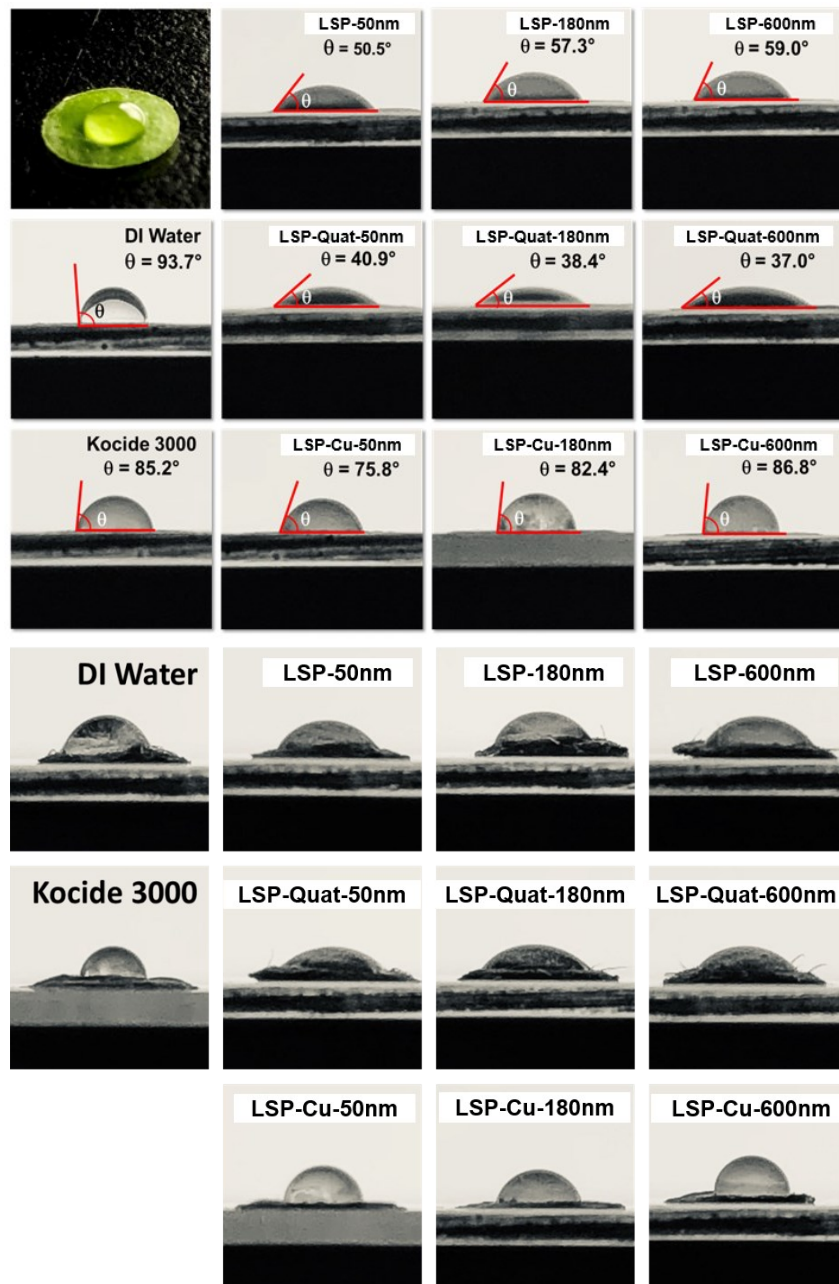

**Figure S4:** Leaf surface wetting measurements (contact angle) on young citrus leaf surface (top panel) and tomato leaves (bottom panel) for water, Kocide 3000, LSP-50nm, LSP-180nm, LSP-600nm, LSP-Cu-50nm, LSP-Cu-180nm, LSP-Cu-600nm, LSP-Quat-50nm, LSP-Quat-180nm, and LSP-Quat-600nm. Qualitative improvements of surface wetting could be observed for LSP particles and LSP-Quat compared to LSP-Cu, DI water, and Kocide 3000. Contact angle values could not be determined accurately due to the variability from leaf to leaf together with high roughness, and fragility of the tomato leaves.

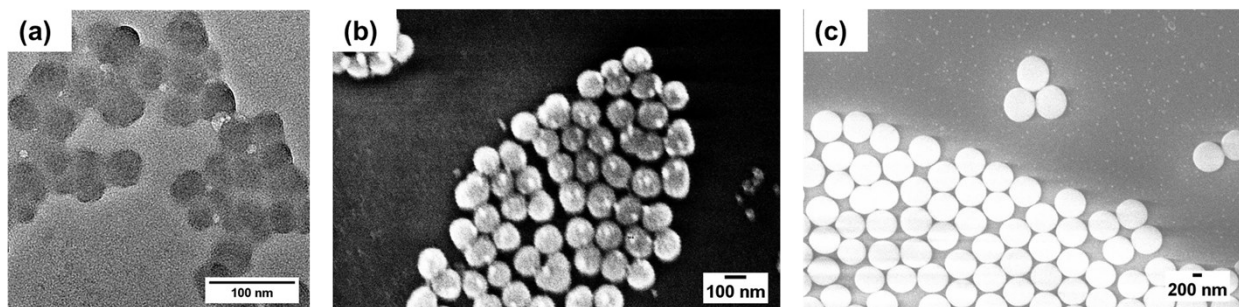

**Figure S5:** Electron microscopy images of silica seeds. (a) TEM image of seed #1, particle size 30 - 45 nm, (b) and (c) are SEM images of seed #2 and seed #3, particle sizes 120 to 150 nm and 550 to 600 nm, respectively.

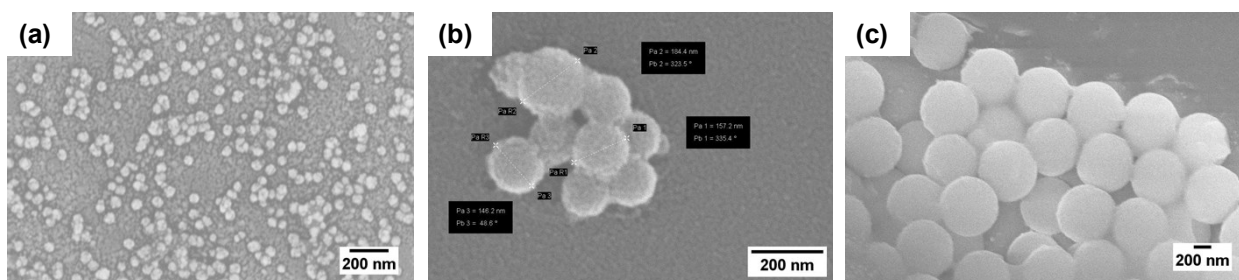

**Figure S6:** SEM images of LSP particles. Size of particles were found to (a) LS-50nm, particles between 40 to 60 nm, (b) LSP-180nm, particles between 140 to 190 nm. (c) LSP-600nm particles, particles between 570 to 650 nm.

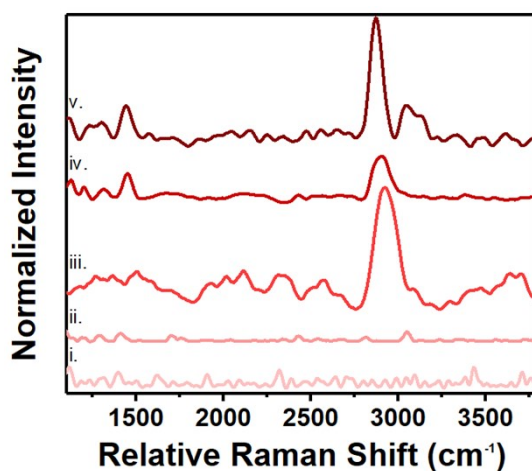

**Figure S7:** Raman spectral analysis of LSP chemical components. i.  $\text{CuSO}_4$ , ii. LSP-Cu-50nm, iii. LSP-Quat-50nm, iv. Inert silica core-shell NPs (seed#1), v. LSP-50nm.

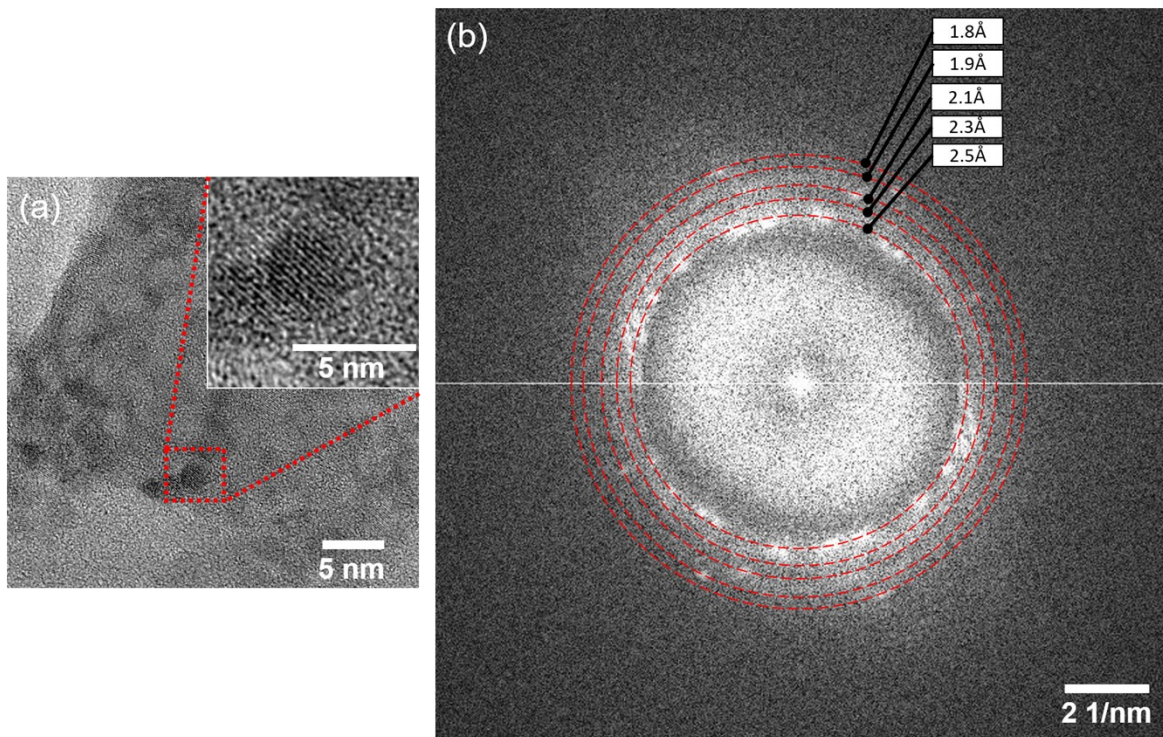

**Figure S8:** Large view of the TEM FFT of Cu Cluster in Fig.1(f) with markers for the d-spacing indicated in Table S1.

**Table S1:** d-spacing values calculated for Cu NPs shown above in the LSP particle shell, compared to copper hydroxide crystal (JCPDS: #13-0420)

| [h k l] | Calculated d-spacing values for Cu nanoclusters in LSP shell (Å) | d-spacing values for Cu hydroxide (JCPDS # 13-0420) (Å) |
|---------|------------------------------------------------------------------|---------------------------------------------------------|
| [1 1 1] | 2.501                                                            | 2.500                                                   |
| [1 3 0] | 2.265                                                            | 2.263                                                   |
| [1 3 1] | 2.090                                                            | 2.078                                                   |
| [1 1 2] | 1.932                                                            | 1.929                                                   |
| [0 6 0] | 1.780                                                            | 1.767                                                   |

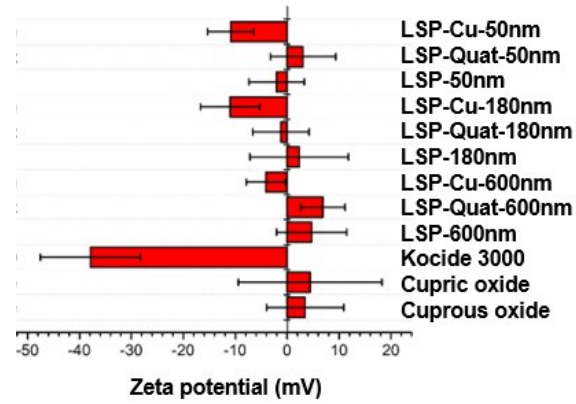

**Figure S9:** Zeta potential of the particles in LSP formulations and control solutions. Kocide 3000 and LSP-Cu formulations all present negative Zeta potentials. The presence of Quat in the formulation leads to an increase in Zeta potentials, to nearly zero or slightly average positive values.

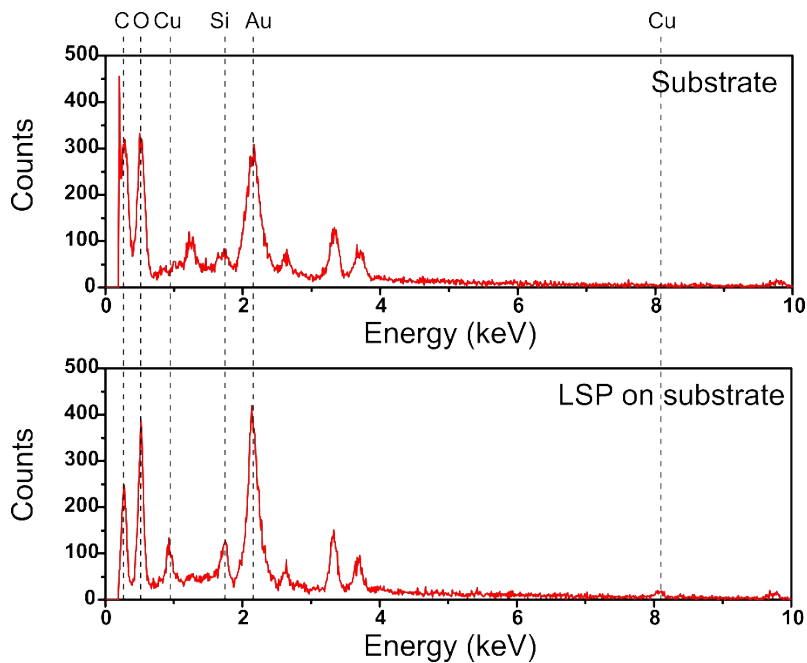

**Figure S10:** Elemental analysis of LSP-50nm performed using Noran system 7 energy-dispersive x-ray fluorescence spectroscope (EDS) using a 15 kV and a working distance of 15 mm.
